# Supplementary material
Source: PubMed Central journal article supplement (PMC9109046)
Supplement: NIHMS1801107-supplement-Supplementary_Material.pdf [file NIHMS1801107-supplement-Supplementary_Material.pdf]

**Web-based Supplementary Materials for  
“Motivating Sample Sizes in Adaptive Phase I Trials  
via Bayesian Posterior Credible Intervals”  
by Thomas M. Braun**

**Web Appendix A**

Three files of R code, used for the simulations and the example discussed in Section 2.3, have been provided.

**Web Table 1**

Results for  $\gamma_\ell = 0.6$ . Each row is a setting defined by:  $\theta$  = target DLT rate,  $K$  = number of doses,  $(p_{min}, p_{max})$  = range of DLT rates,  $\nu$  = MTD dose number,  $R$  = approximate odds ratio of DLT rates around  $\theta$ , and  $\phi$  = half-width of interval of acceptable DLT rates around  $\theta$ .  $N_B$  = sample size via proposed methods. Last six columns summarize empirical performance of CRM starting at either the median dose or the lowest dose and enrolling  $N_B$  patients: % Cov = average posterior mass in  $\theta \pm \phi$ ;  $\widehat{PCS}$  = average probability of correct selection of MTD;  $N_C$  = suggested sample size of Cheung (2013b) based upon  $\widehat{PCS}$ .

| $\theta = 0.20$ |                      |       |      |        |       |             |                 |       |             |                 |       |
|-----------------|----------------------|-------|------|--------|-------|-------------|-----------------|-------|-------------|-----------------|-------|
| $K$             | $(p_{min}, p_{max})$ | $\nu$ | $R$  | $\phi$ | $N_B$ | Median Dose |                 |       | Lowest Dose |                 |       |
|                 |                      |       |      |        |       | % Cov       | $\widehat{PCS}$ | $N_C$ | % Cov       | $\widehat{PCS}$ | $N_C$ |
| 4               | (0.05, 0.40)         | 2     | 1.85 | 0.12   | 18    | 0.69        | 0.45            | 7     | 0.68        | 0.42            | 5     |
| 4               | (0.10, 0.50)         | 2     | 2.00 | 0.13   | 13    | 0.71        | 0.43            | 5     | 0.71        | 0.45            | 6     |
| 5               | (0.05, 0.50)         | 2     | 1.82 | 0.11   | 20    | 0.68        | 0.45            | 11    | 0.67        | 0.44            | 10    |
| 5               | (0.10, 0.60)         | 2     | 1.93 | 0.12   | 15    | 0.70        | 0.45            | 10    | 0.70        | 0.45            | 10    |
| 5               | (0.05, 0.60)         | 2     | 2.04 | 0.14   | 12    | 0.73        | 0.44            | 8     | 0.72        | 0.44            | 8     |
| 6               | (0.05, 0.60)         | 2     | 1.80 | 0.11   | 21    | 0.66        | 0.44            | 14    | 0.65        | 0.42            | 11    |
| 6               | (0.10, 0.70)         | 2     | 1.88 | 0.12   | 16    | 0.69        | 0.46            | 14    | 0.69        | 0.44            | 12    |
| 6               | (0.05, 0.70)         | 2     | 1.97 | 0.13   | 14    | 0.73        | 0.48            | 14    | 0.73        | 0.48            | 14    |

  

| $\theta = 0.25$ |                      |       |      |        |       |             |                 |       |             |                 |       |
|-----------------|----------------------|-------|------|--------|-------|-------------|-----------------|-------|-------------|-----------------|-------|
| $K$             | $(p_{min}, p_{max})$ | $\nu$ | $R$  | $\phi$ | $N_B$ | Median Dose |                 |       | Lowest Dose |                 |       |
|                 |                      |       |      |        |       | % Cov       | $\widehat{PCS}$ | $N_C$ | % Cov       | $\widehat{PCS}$ | $N_C$ |
| 4               | (0.10, 0.50)         | 2     | 1.86 | 0.13   | 15    | 0.65        | 0.44            | 6     | 0.65        | 0.45            | 7     |
| 4               | (0.05, 0.50)         | 2     | 2.00 | 0.15   | 13    | 0.70        | 0.45            | 6     | 0.69        | 0.45            | 6     |
| 4               | (0.15, 0.60)         | 2     | 2.00 | 0.15   | 13    | 0.71        | 0.45            | 6     | 0.70        | 0.43            | 5     |
| 5               | (0.10, 0.60)         | 2     | 1.80 | 0.12   | 18    | 0.65        | 0.47            | 13    | 0.65        | 0.50            | 16    |
| 5               | (0.05, 0.60)         | 2     | 1.90 | 0.14   | 17    | 0.67        | 0.42            | 6     | 0.66        | 0.42            | 7     |
| 5               | (0.15, 0.70)         | 2     | 1.90 | 0.14   | 15    | 0.68        | 0.46            | 10    | 0.67        | 0.44            | 8     |
| 5               | (0.10, 0.70)         | 2     | 2.00 | 0.15   | 12    | 0.71        | 0.46            | 9     | 0.71        | 0.49            | 11    |
| 6               | (0.05, 0.70)         | 3     | 1.84 | 0.13   | 18    | 0.67        | 0.43            | 11    | 0.66        | 0.42            | 9     |

  

| $\theta = 0.30$ |                      |       |      |        |       |             |                 |       |             |                 |       |
|-----------------|----------------------|-------|------|--------|-------|-------------|-----------------|-------|-------------|-----------------|-------|
| $K$             | $(p_{min}, p_{max})$ | $\nu$ | $R$  | $\phi$ | $N_B$ | Median Dose |                 |       | Lowest Dose |                 |       |
|                 |                      |       |      |        |       | % Cov       | $\widehat{PCS}$ | $N_C$ | % Cov       | $\widehat{PCS}$ | $N_C$ |
| 4               | (0.05, 0.50)         | 3     | 1.91 | 0.15   | 14    | 0.67        | 0.44            | 5     | 0.68        | 0.47            | 7     |
| 4               | (0.15, 0.60)         | 2     | 1.91 | 0.15   | 13    | 0.66        | 0.49            | 9     | 0.66        | 0.49            | 9     |
| 4               | (0.10, 0.60)         | 2     | 2.04 | 0.17   | 11    | 0.69        | 0.46            | 5     | 0.68        | 0.45            | 5     |
| 4               | (0.20, 0.70)         | 2     | 2.04 | 0.17   | 12    | 0.71        | 0.45            | 5     | 0.71        | 0.46            | 6     |
| 5               | (0.05, 0.60)         | 3     | 1.81 | 0.14   | 16    | 0.65        | 0.48            | 12    | 0.65        | 0.49            | 13    |
| 5               | (0.15, 0.70)         | 2     | 1.81 | 0.14   | 16    | 0.64        | 0.49            | 14    | 0.64        | 0.47            | 12    |
| 5               | (0.10, 0.70)         | 2     | 1.91 | 0.15   | 15    | 0.65        | 0.44            | 7     | 0.65        | 0.45            | 8     |
| 5               | (0.05, 0.70)         | 3     | 2.01 | 0.16   | 13    | 0.69        | 0.41            | 5     | 0.70        | 0.41            | 5     |

**Web Table 2**

Results for  $\gamma_\ell = 0.7$ . Each row is a setting defined by:  $\theta$  = target DLT rate,  $K$  = number of doses,  $(p_{min}, p_{max})$  = range of DLT rates,  $\nu$  = MTD dose number,  $R$  = approximate odds ratio of DLT rates around  $\theta$ , and  $\phi$  = half-width of interval of acceptable DLT rates around  $\theta$ .  $N_B$  = sample size via proposed methods. Last six columns summarize empirical performance of CRM starting at either the median dose or the lowest dose and enrolling  $N_B$  patients: % Cov = average posterior mass in  $\theta \pm \phi$ ;  $\widehat{PCS}$  = average probability of correct selection of MTD;  $N_C$  = suggested sample size of Cheung (2013b) based upon  $\widehat{PCS}$ .

| $\theta = 0.20$ |                      |       |      |        |       |             |                 |       |             |                 |       |
|-----------------|----------------------|-------|------|--------|-------|-------------|-----------------|-------|-------------|-----------------|-------|
| $K$             | $(p_{min}, p_{max})$ | $\nu$ | $R$  | $\phi$ | $N_B$ | Median Dose |                 |       | Lowest Dose |                 |       |
|                 |                      |       |      |        |       | % Cov       | $\widehat{PCS}$ | $N_C$ | % Cov       | $\widehat{PCS}$ | $N_C$ |
| 4               | (0.05, 0.40)         | 2     | 1.85 | 0.12   | 26    | 0.76        | 0.51            | 15    | 0.76        | 0.50            | 13    |
| 4               | (0.10, 0.50)         | 2     | 2.00 | 0.13   | 20    | 0.79        | 0.52            | 13    | 0.79        | 0.52            | 12    |
| 5               | (0.05, 0.50)         | 2     | 1.82 | 0.11   | 29    | 0.75        | 0.49            | 16    | 0.75        | 0.49            | 17    |
| 5               | (0.10, 0.60)         | 2     | 1.93 | 0.12   | 22    | 0.77        | 0.51            | 16    | 0.77        | 0.49            | 14    |
| 5               | (0.05, 0.60)         | 2     | 2.04 | 0.14   | 17    | 0.80        | 0.52            | 16    | 0.79        | 0.48            | 11    |
| 6               | (0.05, 0.60)         | 2     | 1.80 | 0.11   | 32    | 0.75        | 0.49            | 21    | 0.75        | 0.47            | 18    |
| 6               | (0.10, 0.70)         | 2     | 1.88 | 0.12   | 24    | 0.77        | 0.53            | 24    | 0.76        | 0.49            | 18    |
| 6               | (0.05, 0.70)         | 2     | 1.97 | 0.13   | 20    | 0.80        | 0.52            | 20    | 0.79        | 0.49            | 16    |

  

| $\theta = 0.25$ |                      |       |      |        |       |             |                 |       |             |                 |       |
|-----------------|----------------------|-------|------|--------|-------|-------------|-----------------|-------|-------------|-----------------|-------|
| $K$             | $(p_{min}, p_{max})$ | $\nu$ | $R$  | $\phi$ | $N_B$ | Median Dose |                 |       | Lowest Dose |                 |       |
|                 |                      |       |      |        |       | % Cov       | $\widehat{PCS}$ | $N_C$ | % Cov       | $\widehat{PCS}$ | $N_C$ |
| 4               | (0.10, 0.50)         | 2     | 1.86 | 0.13   | 22    | 0.74        | 0.52            | 14    | 0.74        | 0.55            | 16    |
| 4               | (0.05, 0.50)         | 2     | 2.00 | 0.15   | 20    | 0.79        | 0.49            | 9     | 0.78        | 0.51            | 10    |
| 4               | (0.15, 0.60)         | 2     | 2.00 | 0.15   | 20    | 0.78        | 0.52            | 11    | 0.77        | 0.47            | 7     |
| 5               | (0.10, 0.60)         | 2     | 1.80 | 0.12   | 26    | 0.72        | 0.50            | 16    | 0.72        | 0.51            | 18    |
| 5               | (0.05, 0.60)         | 2     | 1.90 | 0.14   | 27    | 0.75        | 0.48            | 12    | 0.75        | 0.47            | 11    |
| 5               | (0.15, 0.70)         | 2     | 1.90 | 0.14   | 23    | 0.75        | 0.53            | 17    | 0.75        | 0.50            | 14    |
| 5               | (0.10, 0.70)         | 2     | 2.00 | 0.15   | 17    | 0.78        | 0.54            | 17    | 0.77        | 0.56            | 18    |
| 6               | (0.05, 0.70)         | 3     | 1.84 | 0.13   | 32    | 0.76        | 0.50            | 18    | 0.75        | 0.47            | 14    |

  

| $\theta = 0.30$ |                      |       |      |        |       |             |                 |       |             |                 |       |
|-----------------|----------------------|-------|------|--------|-------|-------------|-----------------|-------|-------------|-----------------|-------|
| $K$             | $(p_{min}, p_{max})$ | $\nu$ | $R$  | $\phi$ | $N_B$ | Median Dose |                 |       | Lowest Dose |                 |       |
|                 |                      |       |      |        |       | % Cov       | $\widehat{PCS}$ | $N_C$ | % Cov       | $\widehat{PCS}$ | $N_C$ |
| 4               | (0.05, 0.50)         | 3     | 1.91 | 0.15   | 23    | 0.76        | 0.53            | 13    | 0.77        | 0.57            | 16    |
| 4               | (0.15, 0.60)         | 2     | 1.91 | 0.15   | 20    | 0.74        | 0.57            | 17    | 0.74        | 0.57            | 16    |
| 4               | (0.10, 0.60)         | 2     | 2.04 | 0.17   | 17    | 0.77        | 0.54            | 11    | 0.76        | 0.53            | 10    |
| 4               | (0.20, 0.70)         | 2     | 2.04 | 0.17   | 20    | 0.79        | 0.51            | 9     | 0.78        | 0.50            | 9     |
| 5               | (0.05, 0.60)         | 3     | 1.81 | 0.14   | 25    | 0.73        | 0.56            | 22    | 0.74        | 0.57            | 23    |
| 5               | (0.15, 0.70)         | 2     | 1.81 | 0.14   | 24    | 0.71        | 0.55            | 20    | 0.71        | 0.55            | 21    |
| 5               | (0.10, 0.70)         | 2     | 1.91 | 0.15   | 22    | 0.73        | 0.52            | 14    | 0.72        | 0.52            | 15    |
| 5               | (0.05, 0.70)         | 3     | 2.01 | 0.16   | 23    | 0.78        | 0.50            | 11    | 0.78        | 0.50            | 11    |

**Web Table 3**

Results for  $\gamma_\ell = 0.8$ . Each row is a setting defined by:  $\theta$  = target DLT rate,  $K$  = number of doses,  $(p_{min}, p_{max})$  = range of DLT rates,  $\nu$  = MTD dose number,  $R$  = approximate odds ratio of DLT rates around  $\theta$ , and  $\phi$  = half-width of interval of acceptable DLT rates around  $\theta$ .  $N_B$  = sample size via proposed methods. Last six columns summarize empirical performance of CRM starting at either the median dose or the lowest dose and enrolling  $N_B$  patients: % Cov = average posterior mass in  $\theta \pm \phi$ ;  $\widehat{PCS}$  = average probability of correct selection of MTD;  $N_C$  = suggested sample size of Cheung (2013b) based upon  $\widehat{PCS}$ .

| $\theta = 0.20$ |                      |       |      |        |       |             |                 |       |             |                 |       |
|-----------------|----------------------|-------|------|--------|-------|-------------|-----------------|-------|-------------|-----------------|-------|
| $K$             | $(p_{min}, p_{max})$ | $\nu$ | $R$  | $\phi$ | $N_B$ | Median Dose |                 |       | Lowest Dose |                 |       |
|                 |                      |       |      |        |       | % Cov       | $\widehat{PCS}$ | $N_C$ | % Cov       | $\widehat{PCS}$ | $N_C$ |
| 4               | (0.05, 0.40)         | 2     | 1.85 | 0.12   | 40    | 0.85        | 0.57            | 23    | 0.85        | 0.59            | 27    |
| 4               | (0.10, 0.50)         | 2     | 2.00 | 0.13   | 33    | 0.87        | 0.58            | 20    | 0.87        | 0.59            | 21    |
| 5               | (0.05, 0.50)         | 2     | 1.82 | 0.11   | 45    | 0.84        | 0.58            | 32    | 0.84        | 0.56            | 28    |
| 5               | (0.10, 0.60)         | 2     | 1.93 | 0.12   | 35    | 0.85        | 0.59            | 28    | 0.85        | 0.60            | 30    |
| 5               | (0.05, 0.60)         | 2     | 2.04 | 0.14   | 26    | 0.88        | 0.59            | 24    | 0.88        | 0.57            | 21    |
| 6               | (0.05, 0.60)         | 2     | 1.80 | 0.11   | 49    | 0.84        | 0.58            | 36    | 0.83        | 0.57            | 35    |
| 6               | (0.10, 0.70)         | 2     | 1.88 | 0.12   | 37    | 0.85        | 0.61            | 38    | 0.85        | 0.62            | 40    |
| 6               | (0.05, 0.70)         | 2     | 1.97 | 0.13   | 29    | 0.87        | 0.59            | 30    | 0.86        | 0.59            | 30    |

  

| $\theta = 0.25$ |                      |       |      |        |       |             |                 |       |             |                 |       |
|-----------------|----------------------|-------|------|--------|-------|-------------|-----------------|-------|-------------|-----------------|-------|
| $K$             | $(p_{min}, p_{max})$ | $\nu$ | $R$  | $\phi$ | $N_B$ | Median Dose |                 |       | Lowest Dose |                 |       |
|                 |                      |       |      |        |       | % Cov       | $\widehat{PCS}$ | $N_C$ | % Cov       | $\widehat{PCS}$ | $N_C$ |
| 4               | (0.10, 0.50)         | 2     | 1.86 | 0.13   | 34    | 0.83        | 0.62            | 27    | 0.83        | 0.62            | 29    |
| 4               | (0.05, 0.50)         | 2     | 2.00 | 0.15   | 30    | 0.86        | 0.55            | 14    | 0.86        | 0.56            | 16    |
| 4               | (0.15, 0.60)         | 2     | 2.00 | 0.15   | 34    | 0.85        | 0.58            | 18    | 0.85        | 0.57            | 17    |
| 5               | (0.10, 0.60)         | 2     | 1.80 | 0.12   | 40    | 0.81        | 0.61            | 34    | 0.81        | 0.61            | 34    |
| 5               | (0.05, 0.60)         | 2     | 1.90 | 0.14   | 44    | 0.84        | 0.52            | 16    | 0.84        | 0.51            | 15    |
| 5               | (0.15, 0.70)         | 2     | 1.90 | 0.14   | 37    | 0.84        | 0.59            | 26    | 0.83        | 0.59            | 25    |
| 5               | (0.10, 0.70)         | 2     | 2.00 | 0.15   | 26    | 0.85        | 0.60            | 23    | 0.85        | 0.62            | 26    |
| 6               | (0.05, 0.70)         | 3     | 1.84 | 0.13   | 63    | 0.85        | 0.54            | 23    | 0.84        | 0.53            | 22    |

  

| $\theta = 0.30$ |                      |       |      |        |       |             |                 |       |             |                 |       |
|-----------------|----------------------|-------|------|--------|-------|-------------|-----------------|-------|-------------|-----------------|-------|
| $K$             | $(p_{min}, p_{max})$ | $\nu$ | $R$  | $\phi$ | $N_B$ | Median Dose |                 |       | Lowest Dose |                 |       |
|                 |                      |       |      |        |       | % Cov       | $\widehat{PCS}$ | $N_C$ | % Cov       | $\widehat{PCS}$ | $N_C$ |
| 4               | (0.05, 0.50)         | 3     | 1.91 | 0.15   | 39    | 0.84        | 0.62            | 23    | 0.85        | 0.62            | 23    |
| 4               | (0.15, 0.60)         | 2     | 1.91 | 0.15   | 30    | 0.82        | 0.63            | 26    | 0.82        | 0.64            | 26    |
| 4               | (0.10, 0.60)         | 2     | 2.04 | 0.17   | 25    | 0.84        | 0.59            | 17    | 0.84        | 0.61            | 19    |
| 4               | (0.20, 0.70)         | 2     | 2.04 | 0.17   | 36    | 0.87        | 0.57            | 15    | 0.87        | 0.58            | 16    |
| 5               | (0.05, 0.60)         | 3     | 1.81 | 0.14   | 38    | 0.82        | 0.66            | 40    | 0.82        | 0.65            | 38    |
| 5               | (0.15, 0.70)         | 2     | 1.81 | 0.14   | 36    | 0.80        | 0.63            | 35    | 0.80        | 0.62            | 32    |
| 5               | (0.10, 0.70)         | 2     | 1.91 | 0.15   | 35    | 0.81        | 0.57            | 20    | 0.81        | 0.57            | 21    |
| 5               | (0.05, 0.70)         | 3     | 2.01 | 0.16   | 45    | 0.86        | 0.53            | 14    | 0.86        | 0.54            | 15    |

**Web Table 4**

Results for  $\gamma_\ell = 0.9$ . Each row is a setting defined by:  $\theta$  = target DLT rate,  $K$  = number of doses,  $(p_{min}, p_{max})$  = range of DLT rates,  $\nu$  = MTD dose number,  $R$  = approximate odds ratio of DLT rates around  $\theta$ , and  $\phi$  = half-width of interval of acceptable DLT rates around  $\theta$ .  $N_B$  = sample size via proposed methods. Last six columns summarize empirical performance of CRM starting at either the median dose or the lowest dose and enrolling  $N_B$  patients: % Cov = average posterior mass in  $\theta \pm \phi$ ;  $\widehat{PCS}$  = average probability of correct selection of MTD;  $N_C$  = suggested sample size of Cheung (2013b) based upon  $\widehat{PCS}$ .

| $\theta = 0.20$ |                      |       |      |        |       |             |                 |       |             |                 |       |
|-----------------|----------------------|-------|------|--------|-------|-------------|-----------------|-------|-------------|-----------------|-------|
| $K$             | $(p_{min}, p_{max})$ | $\nu$ | $R$  | $\phi$ | $N_B$ | Median Dose |                 |       | Lowest Dose |                 |       |
|                 |                      |       |      |        |       | % Cov       | $\widehat{PCS}$ | $N_C$ | % Cov       | $\widehat{PCS}$ | $N_C$ |
| 4               | (0.05, 0.40)         | 2     | 1.85 | 0.12   | 67    | 0.93        | 0.67            | 45    | 0.93        | 0.67            | 45    |
| 4               | (0.10, 0.50)         | 2     | 2.00 | 0.13   | 64    | 0.95        | 0.70            | 43    | 0.95        | 0.72            | 47    |
| 5               | (0.05, 0.50)         | 2     | 1.82 | 0.11   | 78    | 0.93        | 0.64            | 46    | 0.92        | 0.63            | 42    |
| 5               | (0.10, 0.60)         | 2     | 1.93 | 0.12   | 65    | 0.94        | 0.71            | 55    | 0.94        | 0.71            | 56    |
| 5               | (0.05, 0.60)         | 2     | 2.04 | 0.14   | 41    | 0.94        | 0.70            | 47    | 0.94        | 0.68            | 42    |
| 6               | (0.05, 0.60)         | 2     | 1.80 | 0.11   | 86    | 0.92        | 0.61            | 44    | 0.92        | 0.60            | 43    |
| 6               | (0.10, 0.70)         | 2     | 1.88 | 0.12   | 67    | 0.93        | 0.71            | 65    | 0.93        | 0.72            | 68    |
| 6               | (0.05, 0.70)         | 2     | 1.97 | 0.13   | 47    | 0.94        | 0.69            | 51    | 0.94        | 0.68            | 49    |

  

| $\theta = 0.25$ |                      |       |      |        |       |             |                 |       |             |                 |       |
|-----------------|----------------------|-------|------|--------|-------|-------------|-----------------|-------|-------------|-----------------|-------|
| $K$             | $(p_{min}, p_{max})$ | $\nu$ | $R$  | $\phi$ | $N_B$ | Median Dose |                 |       | Lowest Dose |                 |       |
|                 |                      |       |      |        |       | % Cov       | $\widehat{PCS}$ | $N_C$ | % Cov       | $\widehat{PCS}$ | $N_C$ |
| 4               | (0.10, 0.50)         | 2     | 1.86 | 0.13   | 55    | 0.91        | 0.71            | 49    | 0.91        | 0.72            | 51    |
| 4               | (0.05, 0.50)         | 2     | 2.00 | 0.15   | 51    | 0.94        | 0.60            | 21    | 0.93        | 0.62            | 23    |
| 4               | (0.15, 0.60)         | 2     | 2.00 | 0.15   | 72    | 0.94        | 0.67            | 32    | 0.94        | 0.65            | 28    |
| 5               | (0.10, 0.60)         | 2     | 1.80 | 0.12   | 65    | 0.90        | 0.68            | 52    | 0.90        | 0.69            | 55    |
| 5               | (0.05, 0.60)         | 2     | 1.90 | 0.14   | 82    | 0.92        | 0.54            | 19    | 0.92        | 0.53            | 17    |
| 5               | (0.15, 0.70)         | 2     | 1.90 | 0.14   | 72    | 0.92        | 0.68            | 44    | 0.92        | 0.68            | 43    |
| 5               | (0.10, 0.70)         | 2     | 2.00 | 0.15   | 43    | 0.93        | 0.72            | 46    | 0.93        | 0.74            | 50    |
| 6               | (0.05, 0.70)         | 3     | 1.84 | 0.13   | 147   | 0.93        | 0.57            | 28    | 0.93        | 0.57            | 27    |

  

| $\theta = 0.30$ |                      |       |      |        |       |             |                 |       |             |                 |       |
|-----------------|----------------------|-------|------|--------|-------|-------------|-----------------|-------|-------------|-----------------|-------|
| $K$             | $(p_{min}, p_{max})$ | $\nu$ | $R$  | $\phi$ | $N_B$ | Median Dose |                 |       | Lowest Dose |                 |       |
|                 |                      |       |      |        |       | % Cov       | $\widehat{PCS}$ | $N_C$ | % Cov       | $\widehat{PCS}$ | $N_C$ |
| 4               | (0.05, 0.50)         | 3     | 1.91 | 0.15   | 78    | 0.92        | 0.69            | 35    | 0.92        | 0.68            | 34    |
| 4               | (0.15, 0.60)         | 2     | 1.91 | 0.15   | 49    | 0.91        | 0.75            | 51    | 0.91        | 0.77            | 55    |
| 4               | (0.10, 0.60)         | 2     | 2.04 | 0.17   | 41    | 0.92        | 0.70            | 32    | 0.92        | 0.69            | 30    |
| 4               | (0.20, 0.70)         | 2     | 2.04 | 0.17   | 78    | 0.94        | 0.64            | 23    | 0.94        | 0.63            | 22    |
| 5               | (0.05, 0.60)         | 3     | 1.81 | 0.14   | 67    | 0.90        | 0.74            | 63    | 0.90        | 0.74            | 60    |
| 5               | (0.15, 0.70)         | 2     | 1.81 | 0.14   | 58    | 0.89        | 0.74            | 61    | 0.89        | 0.73            | 59    |
| 5               | (0.10, 0.70)         | 2     | 1.91 | 0.15   | 61    | 0.90        | 0.64            | 31    | 0.89        | 0.64            | 31    |
| 5               | (0.05, 0.70)         | 3     | 2.01 | 0.16   | 102   | 0.95        | 0.57            | 18    | 0.95        | 0.57            | 18    |
